# Supplementary material for: Cationic peptidopolysaccharides synthesized by ‘click’ chemistry with enhanced broad-spectrum antimicrobial activities
Source: Royal Society of Chemistry journal article supplement (doi:10.1039/c7py00528h), 2017-01-01
Supplement: c7py00528h1.pdf [file c7py00528h1.pdf]

## Supplementary Information

### **Cationic peptidopolysaccharides synthesized by ‘click’ chemistry with enhanced broad-spectrum antimicrobial activities**

Yajuan Su,<sup>a</sup> Liang Tian,<sup>b</sup> Meng Yu,<sup>a</sup> Qiang Gao,<sup>a</sup> Dehui Wang,<sup>c</sup> Yuewei Xi,<sup>a</sup> Peng Yang,<sup>c</sup> Bo  
Lei,<sup>a</sup> Peter X. Ma<sup>a,d,e,f,g</sup> and Peng Li<sup>\*b</sup>

<sup>a</sup> Center for Biomedical Engineering and Regenerative Medicine, Frontier Institute of Science and Technology, Xi'an Jiaotong University, Xi'an 710054, China.

<sup>b</sup> Key Laboratory of Flexible Electronics (KLOFE) and Institute of Advanced Materials (IAM), Jiangsu National Synergetic Innovation Center for Advanced Materials (SICAM), Nanjing Tech University (NanjingTech), Nanjing 211816, China.

\*E-mail: [iamppli@njtech.edu.cn](mailto:iamppli@njtech.edu.cn); Tel/Fax: (86) 25-83587982.

<sup>c</sup> Key Laboratory of Applied Surface and Colloids Chemistry, Ministry of Education, School of Chemistry and Chemical Engineering, Shaanxi Normal University, Xi'an 710119, China.

<sup>d</sup> Department of Biomedical Engineering, University of Michigan, Ann Arbor, MI 48109, USA.

<sup>e</sup> Department of Biologic and Materials Sciences, University of Michigan, Ann Arbor, MI 48109, USA.

<sup>f</sup> Macromolecular Science and Engineering Center, University of Michigan, Ann Arbor, MI 48109, USA.

<sup>g</sup> Department of Materials Science and Engineering, University of Michigan, Ann Arbor, MI 48109, USA.

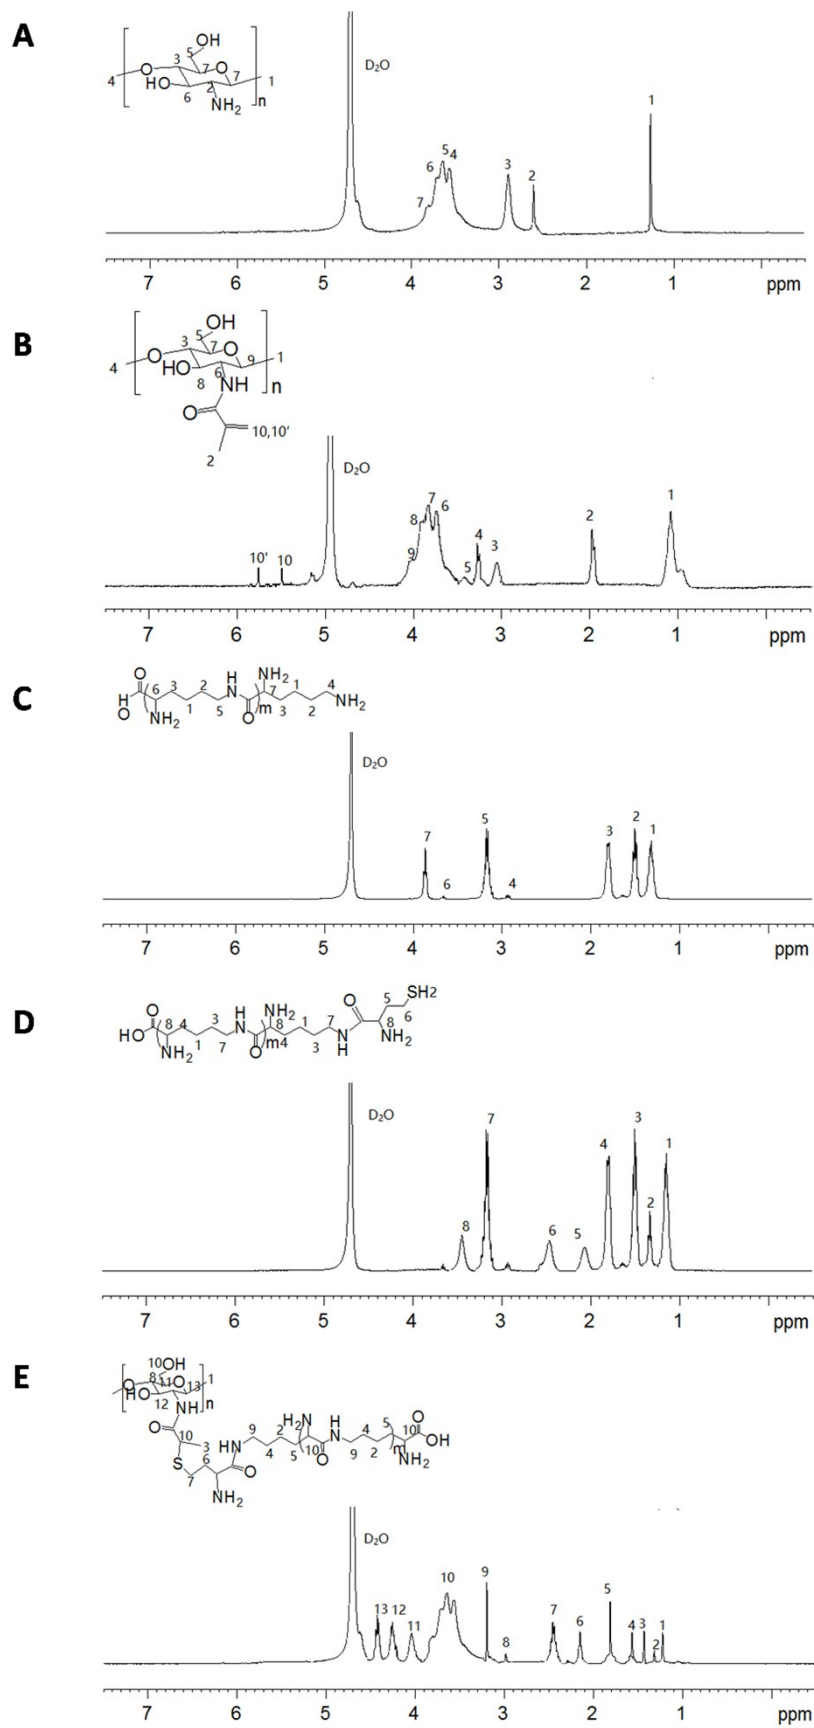

**Figure S1.** <sup>1</sup>H NMR spectra of (A) chitosan, (B) CS-g-MA, (C) EPL, (D) EPL-g-HT and (E) CS-g-EPL.

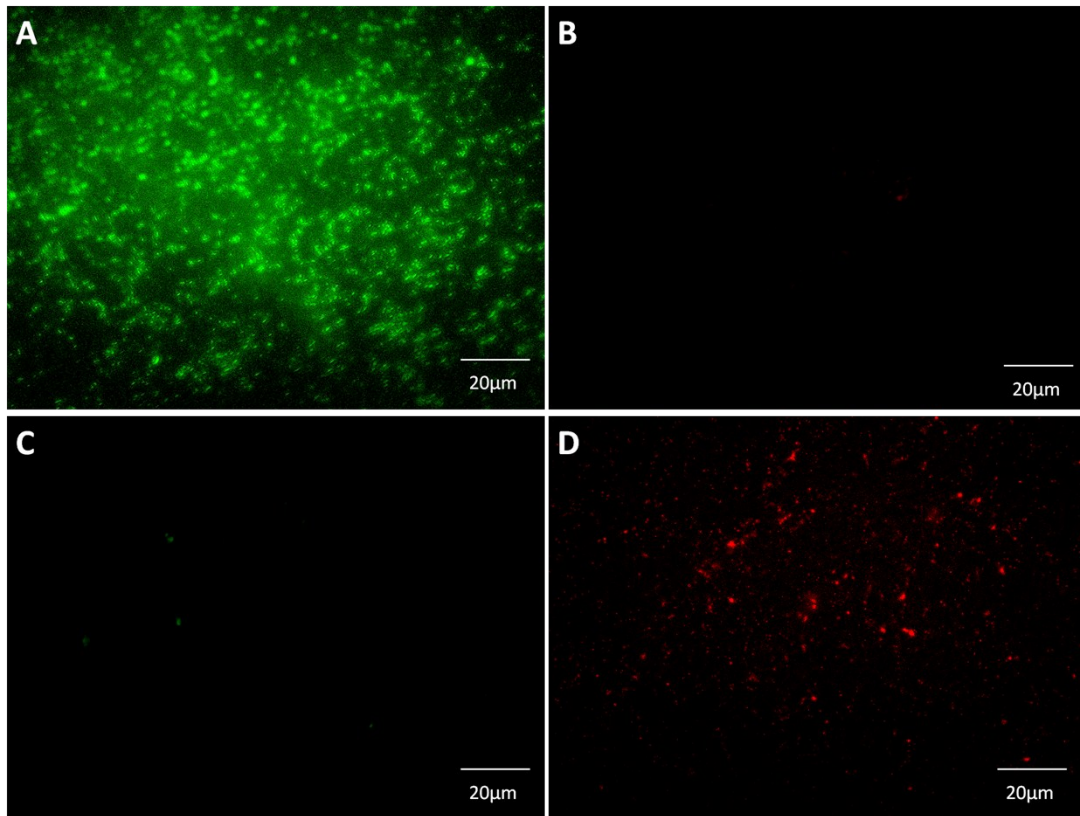

**Figure S2.** The *E. coli* were stained using LIVE/DEAD assay. PBS treated (A, B) and CSL-g-EPL<sub>50%</sub> treated (C, D) cells were stained and imaged using an inverted fluorescence microscope (left column is LIVE and right column is DEAD).
